# Supplementary material for: Non-linear genetic diversity and notable population differentiation caused by low gene flow of bermudagrass [Cynodon dactylon (L.) Pers.] along longitude gradients
Source: PeerJ. 2021 Aug 17;9:e11953. doi: 10.7717/peerj.11953 (PMC8378333; doi:10.7717/peerj.11953)
Supplement: Supplemental Information 2 [file peerj-09-11953-s002.xlsx]

## Sheet: Sheet1
Code	Nuclear DNA contents(pg/2C)	Ploidy level
1-1	2.28655	5
1-2	3.10141	6
1-3	3.6493	5
1-5	3.1957	4
1-6	2.55891	5
1-7	3.3305	2
1-9	3.04806	4
1-10	2.63864	5
1-11	3.00449	3
1-12	3.17301	6
1-13	3.44201	4
1-14	3.13587	5
1-16	3.78196	5
1-17	2.32088	5
1-18	3.15566	2
1-19	2.38739	5
1-20	3.06088	5
2-1	3.51811	5
2-3	3.6428	4
2-4	4.38023	6
2-5	3.4996	6
2-6	2.66636	6
2-7	3.628	6
2-8	2.82946	6
2-9	3.70278	6
2-10	4.15565	5
2-11	3.69872	5
2-12	3.05317	6
2-13	3.42508	6
2-14	3.79105	4
2-15	3.0009	4
2-16	3.70872	6
2-18	2.60208	4
2-19	3.5613	5
2-20	3.47497	5
3-2	2.45752	4
3-3	2.23779	4
3-4	2.52264	4
3-5	2.5063	4
3-6	3.65315	4
3-7	3.1657	5
3-11	2.21703	4
3-12	2.45347	4
3-13	2.32072	4
3-14	2.89316	4
3-15	2.9774	4
3-18	2.44869	4
3-20	3.06166	6
4-2	1.98285	4
4-3	2.09161	4
4-4	2.30219	2
4-5	3.08227	5
4-6	2.25916	3
4-7	2.0987	4
4-8	2.0764	4
4-9	3.35465	5
4-10	2.4529	2
4-11	2.07177	4
4-12	2.40552	4
4-13	2.20588	4
4-14	2.14514	4
4-15	2.32331	4
4-16	1.99753	4
4-17	3.3019	6
4-18	2.41752	4
5-1	2.18757	4
5-2	2.24219	4
5-3	2.1513	4
5-4	3.16031	5
5-5	2.81005	5
5-6	3.05776	6
5-7	2.33201	5
5-9	3.02768	4
5-10	3.15435	6
5-11	2.21148	4
5-12	2.06088	4
5-13	2.2916	4
5-14	2.2141	4
5-16	3.13725	4
5-18	3.12514	3
5-19	3.12654	5
6-1	3.5298	3
6-2	3.74835	4
6-3	3.40704	4
6-4	3.46547	4
6-6	3.23314	2
6-7	2.51418	4
6-9	3.44818	5
6-10	3.47306	6
6-13	3.34311	5
6-14	3.63996	6
6-16	2.62421	4
6-18	3.57671	6
6-19	3.50213	6
6-20	2.43136	5
7-1	2.55739	4
7-3	2.57679	5
7-4	2.3738	4
7-5	2.24229	4
7-7	2.84312	4
7-10	2.24577	4
7-11	2.34712	4
7-12	2.36768	4
7-13	2.52305	4
7-14	2.23641	5
7-15	2.55941	4
7-17	2.83272	4
7-18	2.40452	4
7-19	2.37866	4
8-1	2.20951	4
8-2	2.17613	5
8-3	3.03106	4
8-4	2.2839	3
8-6	3.17616	6
8-8	2.84537	6
8-9	2.9035	5
8-10	2.87	6
8-11	3.03076	5
8-12	2.72096	5
8-13	2.7453	4
8-14	3.09482	5
8-15	3.06123	6
8-17	3.24398	6
8-20	3.00275	5
9-1	2.1911	4
9-2	2.07736	4
9-3	2.58668	3
9-4	2.34889	3
9-5	2.07869	4
9-6	2.01873	2
9-7	1.93792	4
9-8	2.38143	4
9-10	2.55091	4
9-11	2.23119	4
9-12	2.14471	4
9-13	2.3339	4
9-14	2.27917	4
9-16	1.98744	3
9-17	2.16825	6
9-18	2.35161	4
9-19	2.20788	4
9-20	2.34197	4
10-1	3.79354	5
10-2	3.74114	6
10-3	2.61976	6
10-4	3.92398	6
10-7	3.69763	4
10-8	2.44075	4
10-9	4.21957	6
10-10	3.65929	6
10-11	2.11418	6
10-12	2.60265	4
10-13	2.46144	4
10-14	2.55361	6
10-18	2.66013	4
10-19	2.43645	4
10-20	2.48417	4
11-1	3.46381	5
11-2	3.28514	5
11-3	3.01656	2
11-4	3.14081	5
11-5	2.33365	6
11-7	2.62909	4
11-8	2.49948	6
11-9	2.33829	5
11-10	3.41467	2
11-11	3.22058	4
11-12	3.2122	4
11-13	2.47535	3
11-14	2.15389	3
11-16	2.54692	4
11-17	2.53978	3
11-18	2.21143	4
11-19	2.43935	4
11-20	2.48995	4
12-1	3.10308	5
12-2	2.99106	5
12-3	2.9918	4
12-4	3.1043	5
12-5	3.10721	6
12-6	1.91667	4
12-8	2.19894	4
12-9	2.10465	4
12-10	2.02275	4
12-11	2.16359	4
12-12	2.06572	4
12-13	2.11921	4
12-14	2.04834	4
12-15	2.03253	4
12-16	2.08946	4
12-17	2.07891	4
12-18	1.89914	4
12-19	2.04896	4
12-20	1.96414	4
13-1	2.4613	3
13-3	3.40999	5
13-4	3.37796	5
13-5	2.26808	4
13-6	2.01727	4
13-7	3.26268	6
13-8	3.00812	6
13-11	2.29619	2
13-13	2.78818	5
13-14	3.37192	5
13-15	3.02979	6
13-19	3.42728	4
13-20	3.38	5
